# Supplementary material
Source: PubMed Central journal article supplement (PMC8958622)

**Supplement for “Designing warnings for sugary drinks: A randomized experiment with Latino parents and non-Latino parents”**

|                                                                                                                                                           |        |
|-----------------------------------------------------------------------------------------------------------------------------------------------------------|--------|
| <b>eTable 1.</b> Measures used in study                                                                                                                   | Page 2 |
| <b>eTable 2.</b> Raw means and standard deviations of each outcome by warning topic and design                                                            | Page 4 |
| <b>eTable 3.</b> Effects of warning topic and warning design on study outcomes, $n=1,078$ .                                                               | Page 5 |
| <b>eTable 4.</b> Effects of warning type, warning design, and English language use and their interactions on perceived message effectiveness, $n=1,078$ . | Page 6 |
| <b>eFigure 1.</b> Stimuli used in experiment                                                                                                              | Page 8 |
| <b>eFigure 2.</b> Proportion of participants choosing each warning design as most discouraging from wanting to consume sugary drinks, by warning topic.   | Page 9 |

**eTable 1.** Measures used in study

| <b>Construct</b>                                   | <b>Question - English</b>                                                                                          | <b>Response Options - English</b>                                                                                  | <b>Question - Spanish</b>                                                                        | <b>Response Options – Spanish</b>                                                                                                            |
|----------------------------------------------------|--------------------------------------------------------------------------------------------------------------------|--------------------------------------------------------------------------------------------------------------------|--------------------------------------------------------------------------------------------------|----------------------------------------------------------------------------------------------------------------------------------------------|
| Perceived message effectiveness, Item 1            | This message makes me concerned about the health effects of drinking beverages with added sugar.                   | 1=Strongly disagree<br>2=Somewhat disagree<br>3=Neither agree nor disagree<br>4=Somewhat agree<br>5=Strongly agree | Este mensaje hace que me preocupe sobre los efectos de salud que causan las bebidas azucaradas.  | 1=Completamente en desacuerdo<br>2=Algo en desacuerdo<br>3=Ni de acuerdo ni en desacuerdo<br>4=Algo de acuerdo<br>5=Completamente de acuerdo |
| Perceived message effectiveness, Item 2            | This message makes drinking beverages with added sugar seem unpleasant to me.                                      | 1=Strongly disagree<br>2=Somewhat disagree<br>3=Neither agree nor disagree<br>4=Somewhat agree<br>5=Strongly agree | Este mensaje hace que tomar bebidas azucaradas no me parezca apetecible.                         | 1=Completamente en desacuerdo<br>2=Algo en desacuerdo<br>3=Ni de acuerdo ni en desacuerdo<br>4=Algo de acuerdo<br>5=Completamente de acuerdo |
| Perceived message effectiveness, Item 3            | This message discourages me from wanting to drink beverages with added sugar.                                      | 1=Strongly disagree<br>2=Somewhat disagree<br>3=Neither agree nor disagree<br>4=Somewhat agree<br>5=Strongly agree | Este mensaje hace que no quiera tomar bebidas azucaradas.                                        | 1=Completamente en desacuerdo<br>2=Algo en desacuerdo<br>3=Ni de acuerdo ni en desacuerdo<br>4=Algo de acuerdo<br>5=Completamente de acuerdo |
| Harms of sugary drink consumption                  | How much does this message make you think about the health problems caused by drinking beverages with added sugar? | 1=Not at all<br>2=A little bit<br>3=Somewhat<br>4=Quite a bit<br>5=Very much                                       | ¿Cuánto le hace pensar este mensaje en los problemas de salud que causan las bebidas azucaradas? | 1=Nada<br>2=Un poco<br>3=Algo<br>4=Bastante<br>5=Mucho                                                                                       |
| Perceived healthfulness of sugary drinks for child | How healthy or unhealthy would it be for [child] to drink this                                                     | 1=Very unhealthy<br>2=Somewhat unhealthy                                                                           | ¿Qué tan saludable piensa que es que [child] tome esta                                           | 1=Muy poco saludable<br>2=Poco saludable                                                                                                     |

|                                                         |                                                                                                            |                                                                                                    |                                                                                   |                                                                                                   |
|---------------------------------------------------------|------------------------------------------------------------------------------------------------------------|----------------------------------------------------------------------------------------------------|-----------------------------------------------------------------------------------|---------------------------------------------------------------------------------------------------|
|                                                         | beverage every day?                                                                                        | 3=Neither healthy nor unhealthy<br>4=Somewhat healthy<br>5=Very healthy                            | bebida todos los días?                                                            | 3=Ni saludable ni poco saludable<br>4=Saludable<br>5=Muy saludable                                |
| Intentions to purchase sugary drinks for child          | How likely would you be to buy this beverage for [child], if it were available?                            | 1=Not at all likely<br>2=A little likely<br>3=Fairly likely<br>4=Very likely<br>5=Extremely likely | ¿Compraría esta bebida para [child] si estuviera disponible?                      | 1=Muy improbable<br>2= Improbable<br>3=Ni probable ni improbable<br>4= Probable<br>5=Muy probable |
| Which warning most discouraged sugary drink consumption | Which of these messages would discourage you <u>most</u> from wanting to drink beverages with added sugar? | [Show all warning designs for the person's assigned warning topic]                                 | ¿Cuál de estos mensajes le influiría más para no querer tomar bebidas azucaradas? | [Show all warning designs for the person's assigned warning topic]                                |

**eTable 2.** Raw means and standard deviations of each outcome by warning topic and design

|                            | Perceived message effectiveness |     | Thinking about harms |     | Perceived healthfulness |     | Purchase Intentions |     |
|----------------------------|---------------------------------|-----|----------------------|-----|-------------------------|-----|---------------------|-----|
|                            | Mean                            | SD  | Mean                 | SD  | Mean                    | SD  | Mean                | SD  |
| <b>Added sugar</b>         |                                 |     |                      |     |                         |     |                     |     |
| Text                       | 3.9                             | 1.0 | 3.6                  | 1.2 | 1.9                     | 1.2 | 2.3                 | 1.2 |
| Graphic                    | 4.2                             | 1.0 | 4.1                  | 1.1 | 1.7                     | 1.1 | 2.2                 | 1.2 |
| Icon                       | 4.2                             | 1.0 | 3.9                  | 1.2 | 1.8                     | 1.1 | 2.1                 | 1.2 |
| <b>Weight gain</b>         |                                 |     |                      |     |                         |     |                     |     |
| Text                       | 3.9                             | 0.9 | 3.6                  | 1.1 | 2.1                     | 1.3 | 2.3                 | 1.2 |
| Graphic                    | 4.3                             | 0.9 | 4.1                  | 1.2 | 1.9                     | 1.3 | 2.1                 | 1.2 |
| Icon                       | 4.1                             | 0.9 | 3.8                  | 1.1 | 2.0                     | 1.4 | 2.3                 | 1.2 |
| <b>Type-2 diabetes</b>     |                                 |     |                      |     |                         |     |                     |     |
| Text                       | 3.8                             | 1.0 | 3.6                  | 1.2 | 2.1                     | 1.3 | 2.3                 | 1.1 |
| Graphic                    | 4.4                             | 0.9 | 4.1                  | 1.1 | 1.8                     | 1.3 | 2.0                 | 1.1 |
| Icon                       | 3.9                             | 1.0 | 3.7                  | 1.2 | 1.9                     | 1.2 | 2.2                 | 1.2 |
| <b>Heart damage</b>        |                                 |     |                      |     |                         |     |                     |     |
| Text                       | 3.8                             | 1.0 | 3.6                  | 1.2 | 2.1                     | 1.3 | 2.4                 | 1.2 |
| Graphic                    | 4.2                             | 0.9 | 3.9                  | 1.2 | 1.9                     | 1.3 | 2.2                 | 1.3 |
| Icon                       | 4.1                             | 1.0 | 3.8                  | 1.2 | 2.0                     | 1.3 | 2.2                 | 1.2 |
| <b>Littering (control)</b> |                                 |     |                      |     |                         |     |                     |     |
| Text                       | 2.3                             | 1.4 | 2.5                  | 1.5 | 2.1                     | 1.3 | 2.7                 | 1.2 |
| Graphic                    | 2.2                             | 1.4 | 2.4                  | 1.5 | 2.1                     | 1.3 | 2.6                 | 1.2 |
| Icon                       | 2.4                             | 1.4 | 2.5                  | 1.5 | 2.1                     | 1.3 | 2.6                 | 1.3 |

**eTable 3.** Effects of warning topic and warning design on study outcomes,  $n=1,078$ .

|                       | Perceived message effectiveness |                   |                   | Thinking about the harms of sugary drinks for child |                   |                   | Perceived healthfulness of sugary drinks for child |                   |                   | Intentions to purchase sugary drinks for child |                   |                   |
|-----------------------|---------------------------------|-------------------|-------------------|-----------------------------------------------------|-------------------|-------------------|----------------------------------------------------|-------------------|-------------------|------------------------------------------------|-------------------|-------------------|
|                       | <i>d</i>                        | Lower bound<br>CI | Upper bound<br>CI | <i>d</i>                                            | Lower bound<br>CI | Upper bound<br>CI | <i>d</i>                                           | Lower bound<br>CI | Upper bound<br>CI | <i>d</i>                                       | Lower bound<br>CI | Upper bound<br>CI |
| <b>Warning topic</b>  |                                 |                   |                   |                                                     |                   |                   |                                                    |                   |                   |                                                |                   |                   |
| Littering (reference) |                                 |                   |                   |                                                     |                   |                   |                                                    |                   |                   |                                                |                   |                   |
| Added sugar           | 1.51                            | 1.39              | 1.64              | 1.05                                                | 0.93              | 1.16              | -0.27                                              | -0.38             | -0.16             | -0.35                                          | -0.46             | -0.24             |
| Heart damage          | 1.47                            | 1.35              | 1.59              | 0.95                                                | 0.84              | 1.07              | -0.11                                              | -0.22             | 0.00              | -0.29                                          | -0.39             | -0.18             |
| Type 2 diabetes       | 1.46                            | 1.33              | 1.58              | 0.98                                                | 0.86              | 1.09              | -0.16                                              | -0.27             | -0.05             | -0.40                                          | -0.51             | -0.29             |
| Weight gain           | 1.53                            | 1.40              | 1.65              | 1.03                                                | 0.92              | 1.15              | -0.10                                              | -0.21             | 0.01              | -0.29                                          | -0.40             | -0.18             |
| <b>Warning design</b> |                                 |                   |                   |                                                     |                   |                   |                                                    |                   |                   |                                                |                   |                   |
| Text (reference)      |                                 |                   |                   |                                                     |                   |                   |                                                    |                   |                   |                                                |                   |                   |
| Icon                  | 0.14                            | 0.06              | 0.23              | 0.12                                                | 0.03              | 0.20              | -0.08                                              | -0.17             | 0.00              | -0.09                                          | -0.17             | 0.00              |
| Graphic               | 0.23                            | 0.14              | 0.31              | 0.26                                                | 0.17              | 0.34              | -0.14                                              | -0.23             | -0.06             | -0.13                                          | -0.21             | -0.04             |

*Note.* *d*=Cohen's *d*. CI=confidence interval. No account taken of repeated nature of responses within warning topic (across warning designs).

**eTable 4.** Effects of warning type, warning design, and English language use and their interactions on perceived message effectiveness,  $n=1,078$ .

|                                 | $\beta$ | SE   | $p$    |
|---------------------------------|---------|------|--------|
| <b>Warning topic</b>            |         |      |        |
| Added sugar                     | 1.68    | 0.11 | <0.001 |
| Heart damage                    | 1.62    | 0.11 | <0.001 |
| Type 2 diabetes                 | 1.57    | 0.11 | <0.001 |
| Weight gain                     | 1.59    | 0.11 | <0.001 |
| <b>Warning design</b>           |         |      |        |
| Icon                            | 0.03    | 0.06 | 0.017  |
| Graphic                         | -0.15   | 0.06 | 0.622  |
| <b>Topic X design</b>           |         |      |        |
| Added sugar X icon              | 0.22    | 0.09 | 0.014  |
| Added sugar X graphic           | 0.46    | 0.09 | <0.001 |
| Heart damage X icon             | 0.19    | 0.09 | 0.038  |
| Heart damage X graphic          | 0.53    | 0.09 | <0.001 |
| Type 2 diabetes X icon          | 0.07    | 0.09 | 0.478  |
| Type 2 diabetes X graphic       | 0.66    | 0.09 | <0.001 |
| Weight gain X icon              | 0.15    | 0.09 | 0.103  |
| Weight gain X graphic           | 0.51    | 0.09 | <0.001 |
| <b>Low English Use (LEU)</b>    | 0.27    | 0.23 | 0.208  |
| <b>Topic X LEU</b>              |         |      |        |
| Added sugar X LEU               | 0.14    | 0.31 | 0.659  |
| Heart damage X LEU              | -0.22   | 0.30 | 0.471  |
| Type 2 diabetes X LEU           | -0.25   | 0.29 | 0.391  |
| Weight gain X LEU               | -0.05   | 0.30 | 0.856  |
| <b>Design X LEU</b>             |         |      |        |
| Icon X LEU                      | 0.55    | 0.18 | 0.002  |
| Graphic X LEU                   | 0.52    | 0.18 | 0.005  |
| <b>Topic X Design X LEU</b>     |         |      |        |
| Added sugar X icon X LEU        | -0.91   | 0.26 | <0.001 |
| Added sugar X graphic X LEU     | -1.07   | 0.26 | <0.001 |
| Heart damage X icon X LEU       | -0.29   | 0.26 | 0.266  |
| Heart damage X graphic X LEU    | -0.54   | 0.26 | 0.036  |
| Type 2 diabetes X icon X LEU    | -0.36   | 0.25 | 0.141  |
| Type 2 diabetes X graphic X LEU | -0.16   | 0.25 | 0.524  |
| Weight gain X icon X LEU        | -0.26   | 0.25 | 0.299  |

---

|                             |       |      |       |
|-----------------------------|-------|------|-------|
| Weight gain X graphic X LEU | -0.32 | 0.26 | 0.216 |
|-----------------------------|-------|------|-------|

eFigure 1. Stimuli used in experiment

|         | Added Sugar                                                                                                         | Weight Gain                                                                                                                                                              | Warning Topic<br>Type 2 Diabetes                                                                                                                                              | Heart Damage                                                                                                                                                                | Control                                                                                                               |
|---------|---------------------------------------------------------------------------------------------------------------------|--------------------------------------------------------------------------------------------------------------------------------------------------------------------------|-------------------------------------------------------------------------------------------------------------------------------------------------------------------------------|-----------------------------------------------------------------------------------------------------------------------------------------------------------------------------|-----------------------------------------------------------------------------------------------------------------------|
| Text    | WARNING: High in added sugar.                                                                                       | WARNING: Excess consumption of drinks with added sugar contributes to weight gain.                                                                                       | WARNING: Excess consumption of drinks with added sugar contributes to type 2 diabetes.                                                                                        | WARNING: Excess consumption of drinks with added sugar contributes to heart damage.                                                                                         | Please refrain from littering.                                                                                        |
| Icon    | <br>WARNING: High in added sugar.  | <br>WARNING: Excess consumption of drinks with added sugar contributes to weight gain.  | <br>WARNING: Excess consumption of drinks with added sugar contributes to type 2 diabetes.  | <br>WARNING: Excess consumption of drinks with added sugar contributes to heart damage.  | <br>Please refrain from littering. |
| Graphic | <br>WARNING: High in added sugar. | <br>WARNING: Excess consumption of drinks with added sugar contributes to weight gain. | <br>WARNING: Excess consumption of drinks with added sugar contributes to type 2 diabetes. | <br>WARNING: Excess consumption of drinks with added sugar contributes to heart damage. | <br>Please refrain from littering. |
| Octagon | WARNING: High in added sugar.                                                                                       | WARNING: Excess consumption of drinks with added sugar contributes to weight gain.                                                                                       | WARNING: Excess consumption of drinks with added sugar contributes to type 2 diabetes.                                                                                        | WARNING: Excess consumption of drinks with added sugar contributes to heart damage.                                                                                         |                                                                                                                       |



**eFigure 2.** Proportion of participants choosing each warning design as most discouraging from wanting to consume sugary drinks, by warning topic. \*\* $p < .001$ , \* $p < .05$ , NS= $p > .05$  for each bar compared to the next.

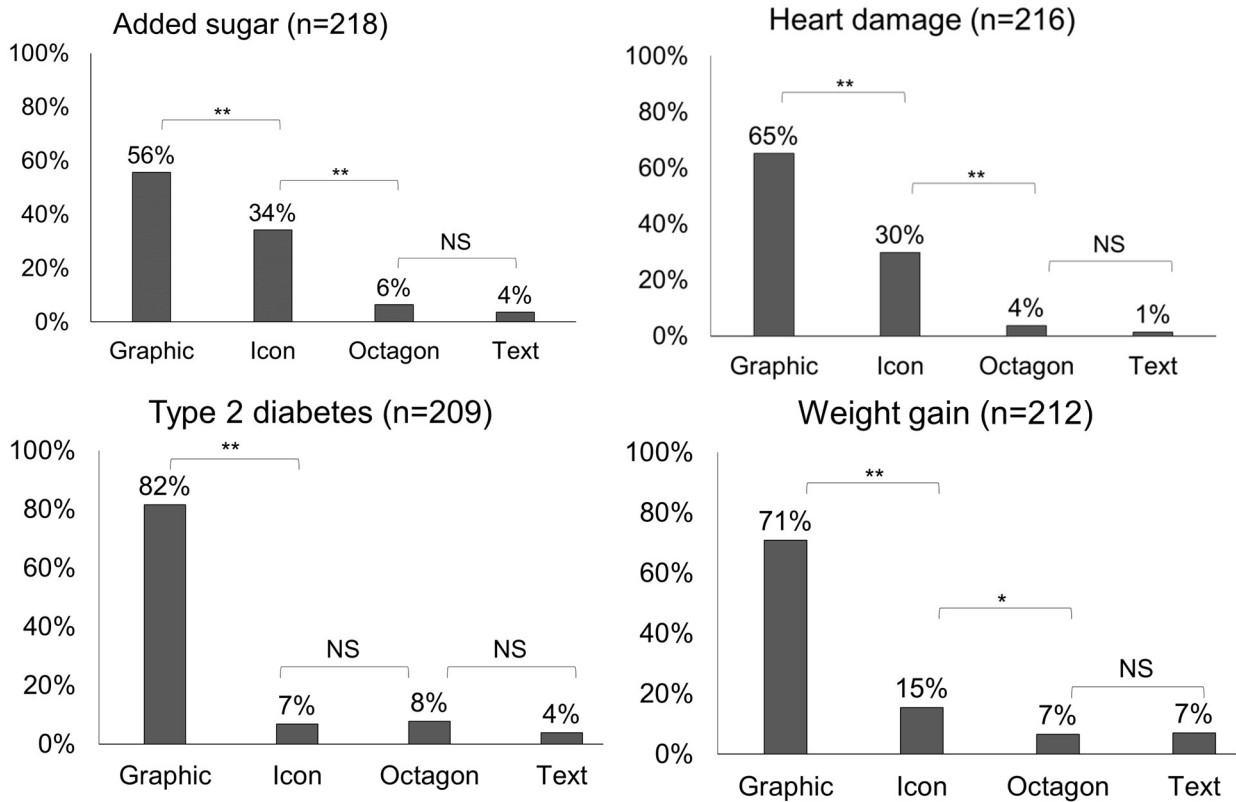

Supplement: NIHMS1743649-supplement-supplementary.pdf [file NIHMS1743649-supplement-supplementary.pdf]
